# Supplementary material
Source: PubMed Central journal article supplement (PMC6496525)

**A****Networks related to genes downregulated in hMSC culture passage 5 (P5)**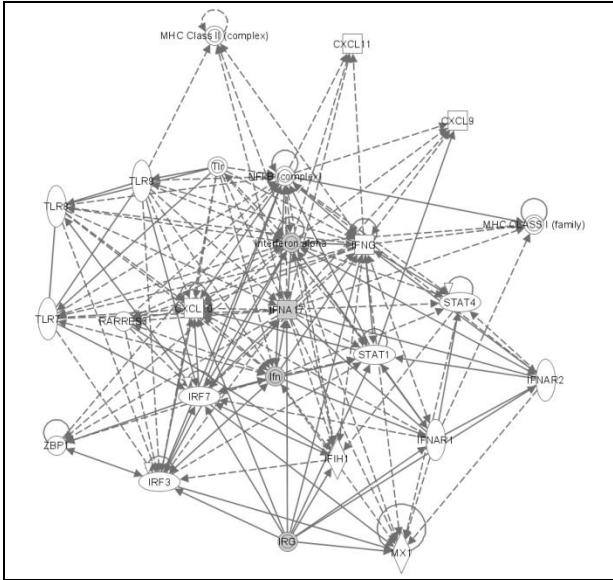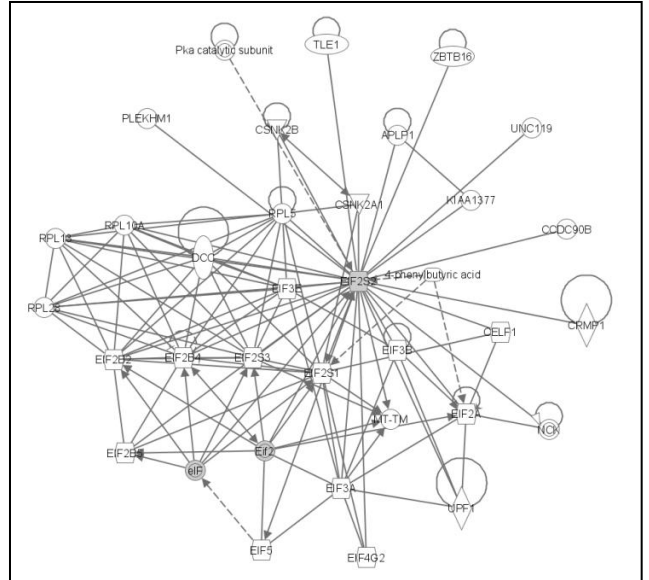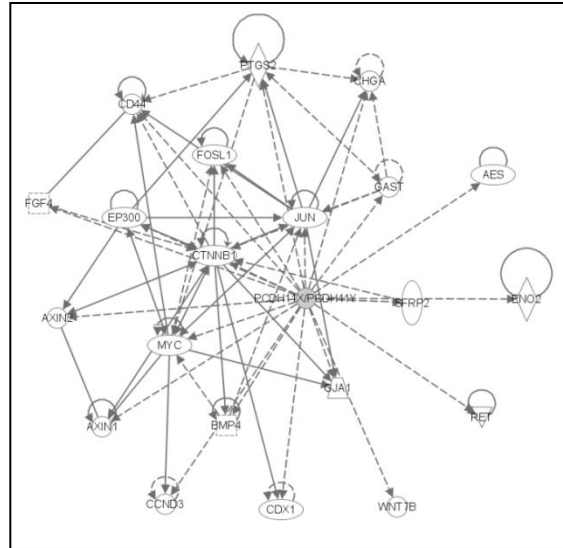**B****Networks related to genes overexpressed in hMSC culture passage 5 (P5)**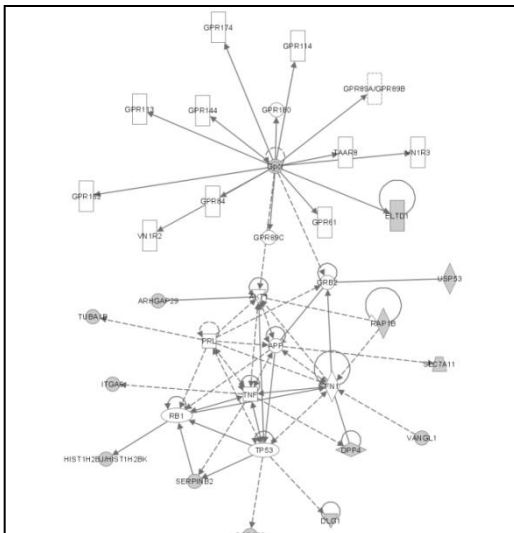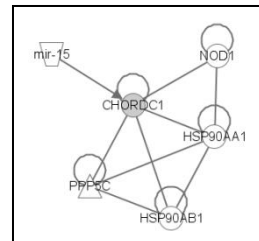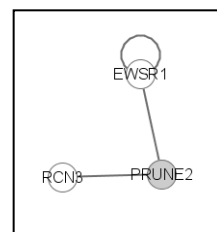

Supplement: CPR-46-10-s001.pdf [file CPR-46-10-s001.pdf]
