# Supplementary material
Source: PubMed Central journal article supplement (PMC6496525)

**A****Networks related to genes downregulated in hMSC culture passage 8 (P8)**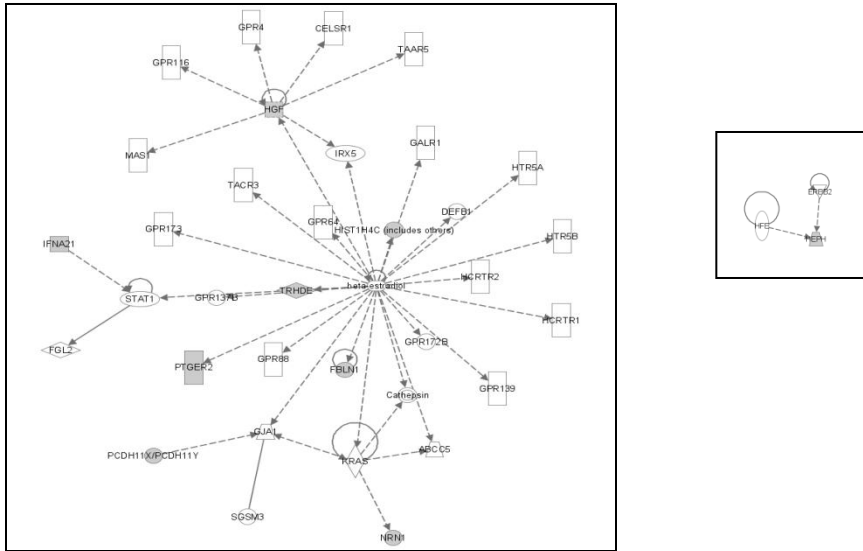**B****Networks related to genes overexpressed in hMSC culture passage 8 (P8)**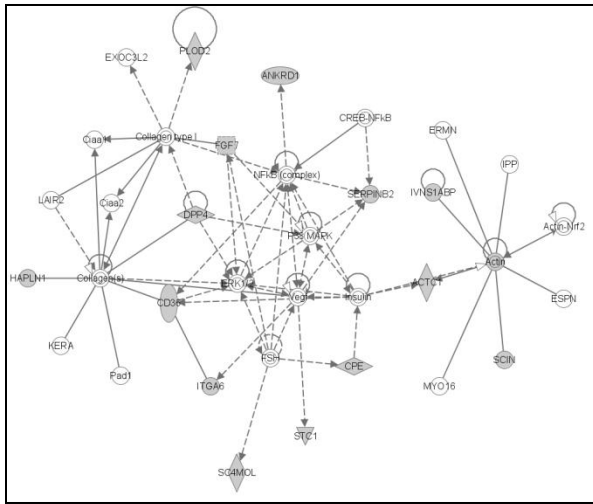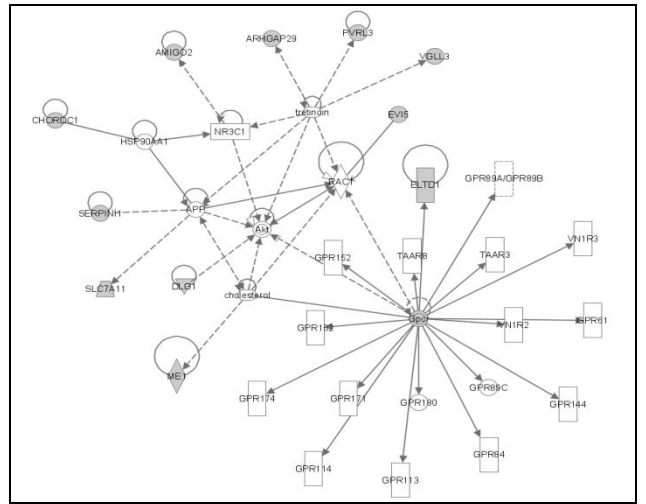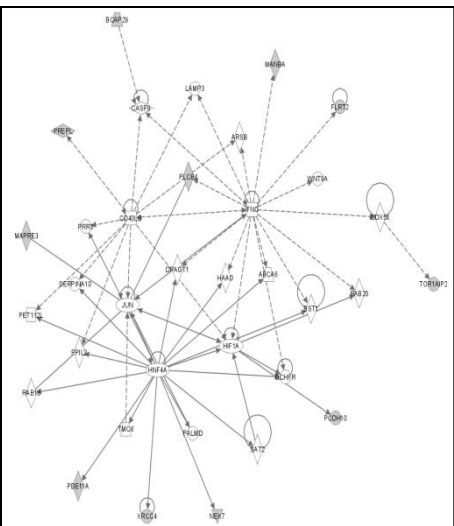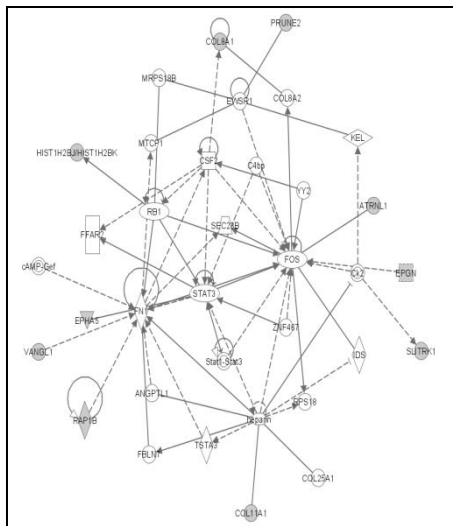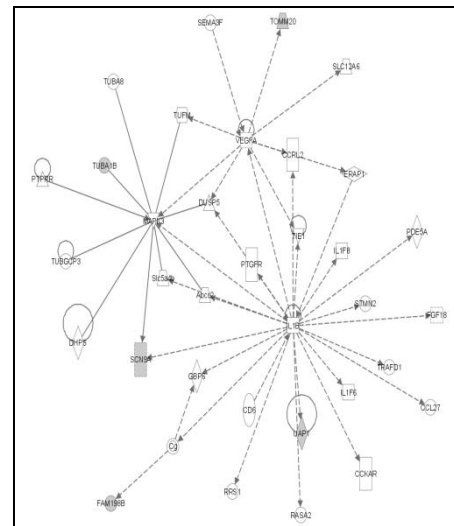

Supplement: CPR-46-10-s002.pdf [file CPR-46-10-s002.pdf]
